# Supplementary material
Source: PubMed Central journal article supplement (PMC6990948)
Supplement: jamasurg-155-e195085-s002.pdf [file jamasurg-155-e195085-s002.pdf]

## Supplementary Online Content

Pusateri AE, Moore EE, Moore HB, et al. Association of prehospital plasma transfusion with survival in trauma patients with hemorrhagic shock when transport times are longer than 20 minutes: a post hoc analysis of the PAMPer and COMBAT clinical trials. *JAMA Surg*. Published December 18, 2019. doi:10.1001/jamasurg.2019.5085

**eTable 1.** Harmonized Inclusion Criteria

**eTable 2.** Harmonized Exclusion Criteria

**eTable 3.** Interventions

**eTable 4.** Mortality and Secondary Outcomes by Transport Time

**eFigure 1.** Comparison of Transport Time by Cohort

**eFigure 2.** Distribution of Patient Transport Time (Minutes) by Cohort

**eFigure 3.** Distribution of Patient Transport Time by Cohort

**eFigure 4.** International Normalized Ratio (INR) by Treatment (Plasma vs Standard Care [SC]) and Transport Time

This supplementary material has been provided by the authors to give readers additional information about their work.

**eTable 1.** Harmonized Inclusion Criteria

|                                                                                                                                                                                  |
|----------------------------------------------------------------------------------------------------------------------------------------------------------------------------------|
| Acutely injured patients with blunt or penetrating trauma in severe hemorrhagic shock                                                                                            |
| Transported by ground or air ambulance                                                                                                                                           |
| Presence of electrical activity and/or measureable or palpable blood pressure at time of randomization                                                                           |
| Age $\geq$ 18 years                                                                                                                                                              |
| Shock definition: Acutely injured, with presumed hemorrhagic shock from acute blood loss defined as SBP $\leq$ 70 mmHg or with SBP 71-90 mmHg and HR $\geq$ 108 beats per minute |
| Either sex                                                                                                                                                                       |
| Volume of crystalloid administered prior to randomization can be documented                                                                                                      |

**eTable 2.** Harmonized Exclusion Criteria

|                                                                                  |
|----------------------------------------------------------------------------------|
| Age <18 years                                                                    |
| Inability to obtain intravenous or intraosseous access                           |
| Penetrating cranial injury                                                       |
| Traumatic brain injury with brain matter exposed.                                |
| Visibly or verbally reported pregnant woman                                      |
| Burns over 20% body surface area                                                 |
| Cardiac arrest or CPR prior to randomization                                     |
| Known prisoner                                                                   |
| Unsalvageable injuries                                                           |
| Known religious objection to blood products                                      |
| Patient has an opt-out bracelet, necklace or wallet card                         |
| Patient (if lucid) or family member at scene declines participation in the study |

**eTable 3. Interventions**

| Parameter           | COMBAT                                                                                            | PAMPer                                                                                                                                                                                             |
|---------------------|---------------------------------------------------------------------------------------------------|----------------------------------------------------------------------------------------------------------------------------------------------------------------------------------------------------|
| Plasma              | Type AB thawed plasma (TP)                                                                        | Type AB or low titer type A thawed plasma                                                                                                                                                          |
| Handling Procedures | Plasma carried frozen and thawed in the ground ambulance                                          | TP carried refrigerated in the air ambulance                                                                                                                                                       |
| Plasma Group        | Patients randomized to the plasma group receive 2 units of plasma followed by local standard care | Patients randomized to the plasma group receive 2 units of plasma followed by local standard care.                                                                                                 |
| Control Group       | Local Standard Care. Goal directed prehospital crystalloid resuscitation using normal saline.     | Local Standard Care. Goal directed prehospital crystalloid (normal saline or lactated Ringer's solution) or uncrossmatched packed red blood cells depending on the particular air medical service. |

**eTable 4.** Mortality and Secondary Outcomes by Transport Time

|                                                                                                                                                                                                                                                                                                                               | All           | ≤20 min       | >20 min       | P Value |
|-------------------------------------------------------------------------------------------------------------------------------------------------------------------------------------------------------------------------------------------------------------------------------------------------------------------------------|---------------|---------------|---------------|---------|
| Number of participants, No. (%)                                                                                                                                                                                                                                                                                               | 626 (100)     | 96 (15.3)     | 530 (84.7)    | –       |
| Mortality, No. (%)                                                                                                                                                                                                                                                                                                            |               |               |               |         |
| 28-day, Overall                                                                                                                                                                                                                                                                                                               | 155 (24.8)    | 20 (20.8)     | 135 (25.5)    | 0.33    |
| 24-hour, Overall                                                                                                                                                                                                                                                                                                              | 106 (16.9)    | 15 (15.6)     | 91 (17.2)     | 0.71    |
| Transfusion received, Median (IQR) Units                                                                                                                                                                                                                                                                                      |               |               |               |         |
| In first 6 hour after ED admission                                                                                                                                                                                                                                                                                            |               |               |               |         |
| PRBC, Overall                                                                                                                                                                                                                                                                                                                 | 5 (2-10)      | 6 (2-13)      | 5 (2-9)       | 0.26    |
| SC                                                                                                                                                                                                                                                                                                                            | 6 (2-10)      | 6 (2-12)      | 5 (3-10)      | 0.84    |
| Plasma                                                                                                                                                                                                                                                                                                                        | 5 (2-8)       | 8 (2-17)      | 4 (2-8)       | 0.06    |
| FFP, Overall                                                                                                                                                                                                                                                                                                                  | 3 (2-6)       | 4 (2-8)       | 2 (2-6)       | 0.03    |
| SC                                                                                                                                                                                                                                                                                                                            | 4 (2-9)       | 4 (2-8)       | 5 (2-10)      | 0.49    |
| Plasma                                                                                                                                                                                                                                                                                                                        | 2 (2-5)       | 4 (2-8)       | 2 (2-4)       | 0.002   |
| Platelet, Overall                                                                                                                                                                                                                                                                                                             | 2 (1-3)       | 1 (1-2)       | 2 (1-3)       | 0.29    |
| SC                                                                                                                                                                                                                                                                                                                            | 2 (1-3)       | 1 (1-2)       | 2 (1-3)       | 0.19    |
| Plasma                                                                                                                                                                                                                                                                                                                        | 1 (1-2)       | 2 (1-2)       | 1 (1-2)       | 0.86    |
| In first 24 hour after ED admission                                                                                                                                                                                                                                                                                           |               |               |               |         |
| PRBC, Overall                                                                                                                                                                                                                                                                                                                 | 5 (2-10)      | 7 (2-13)      | 5 (2-10)      | 0.26    |
| SC                                                                                                                                                                                                                                                                                                                            | 6 (3-10)      | 7 (2-13)      | 6 (3-10)      | 0.96    |
| Plasma                                                                                                                                                                                                                                                                                                                        | 5 (2-10)      | 7 (2-17)      | 4 (2-8)       | 0.10    |
| FFP, Overall                                                                                                                                                                                                                                                                                                                  | 3 (2-7)       | 4 (2-9)       | 3 (2-6)       | 0.04    |
| SC                                                                                                                                                                                                                                                                                                                            | 4 (2-10)      | 4 (2-9)       | 5 (2-10)      | 0.19    |
| Plasma                                                                                                                                                                                                                                                                                                                        | 2 (2-6)       | 5 (2-10)      | 2 (2-4)       | <.001   |
| Platelet, Overall                                                                                                                                                                                                                                                                                                             | 2 (1-3)       | 2 (1-2)       | 1 (1-3)       | 0.74    |
| SC                                                                                                                                                                                                                                                                                                                            | 2 (1-3)       | 1 (1-3)       | 2 (1-3)       | 0.50    |
| Plasma                                                                                                                                                                                                                                                                                                                        | 1 (1-2)       | 2 (1-2)       | 1 (1-2)       | 0.60    |
| INR at ED arrival, Median (IQR)                                                                                                                                                                                                                                                                                               |               |               |               |         |
| Overall                                                                                                                                                                                                                                                                                                                       | 1.2 (1.1-1.4) | 1.2 (1.1-1.4) | 1.2 (1.1-1.4) | 0.85    |
| SC                                                                                                                                                                                                                                                                                                                            | 1.3 (1.1-1.6) | 1.1 (1.1-1.5) | 1.3 (1.1-1.6) | 0.02    |
| Plasma                                                                                                                                                                                                                                                                                                                        | 1.2 (1.1-1.3) | 1.3 (1.2-1.4) | 1.2 (1.1-1.3) | 0.01    |
| Ventilator-free Days 28-day follow-up                                                                                                                                                                                                                                                                                         |               |               |               |         |
| All survivors (n=471), Median (IQR)                                                                                                                                                                                                                                                                                           | 27 (22-28)    | 27 (24-28)    | 27 (22-28)    | 0.68    |
| SC                                                                                                                                                                                                                                                                                                                            | 27 (24-28)    | 27 (25-28)    | 27 (23-28)    | 0.51    |
| Plasma                                                                                                                                                                                                                                                                                                                        | 26 (20-28)    | 26 (22-28)    | 26 (20-28)    | 0.72    |
| ICU-free days 28-day follow-up                                                                                                                                                                                                                                                                                                |               |               |               |         |
| All survivors (n=471), Median (IQR)                                                                                                                                                                                                                                                                                           | 23 (15-26)    | 24 (19-26)    | 23 (14-26)    | 0.12    |
| SC                                                                                                                                                                                                                                                                                                                            | 23 (16-26)    | 24 (20-26)    | 23 (15-26)    | 0.06    |
| Plasma                                                                                                                                                                                                                                                                                                                        | 23 (14-26)    | 23 (16-26)    | 23 (14-26)    | 0.79    |
| Abbreviations: SC, standard care; ED, emergency department; IQR, interquartile ranges; RBC, red blood cells; FFP, fresh frozen plasma; INR, International Normalized Ratio; ICU, intensive care unit. The <i>P</i> -values were calculated with the use of a chi-square, t-test or Wilcoxon-Mann-Whitney test as appropriate. |               |               |               |         |

**eFigure 1.** Comparison of Transport Time by Cohort

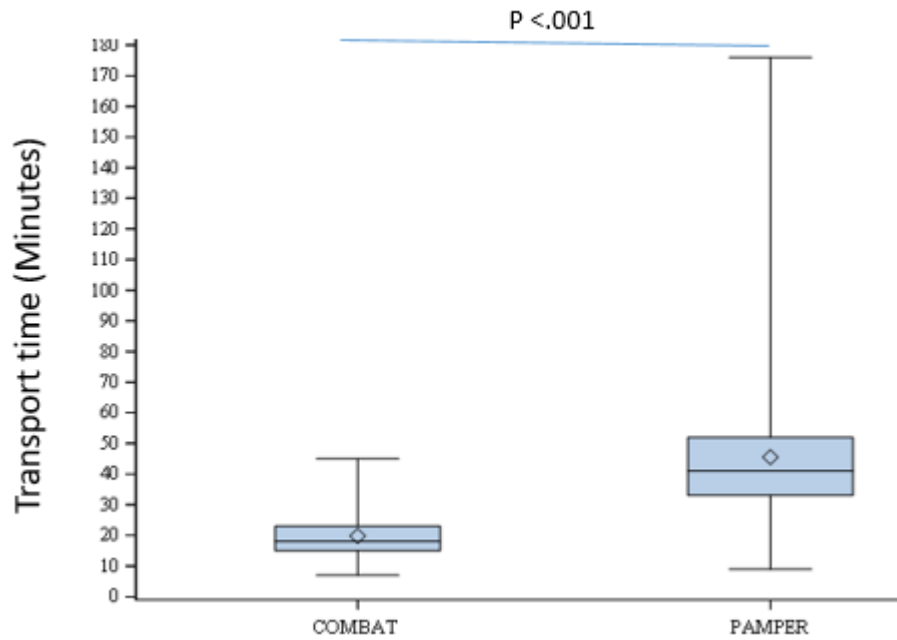

**eFigure 2.** Distribution of Patient Transport Time (Minutes) by Cohort

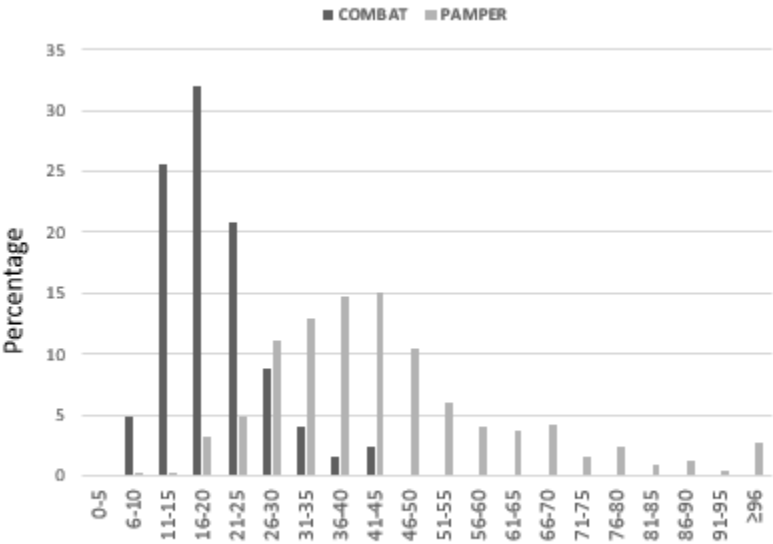

**eFigure 3.** Distribution of Patient Transport Time by Cohort

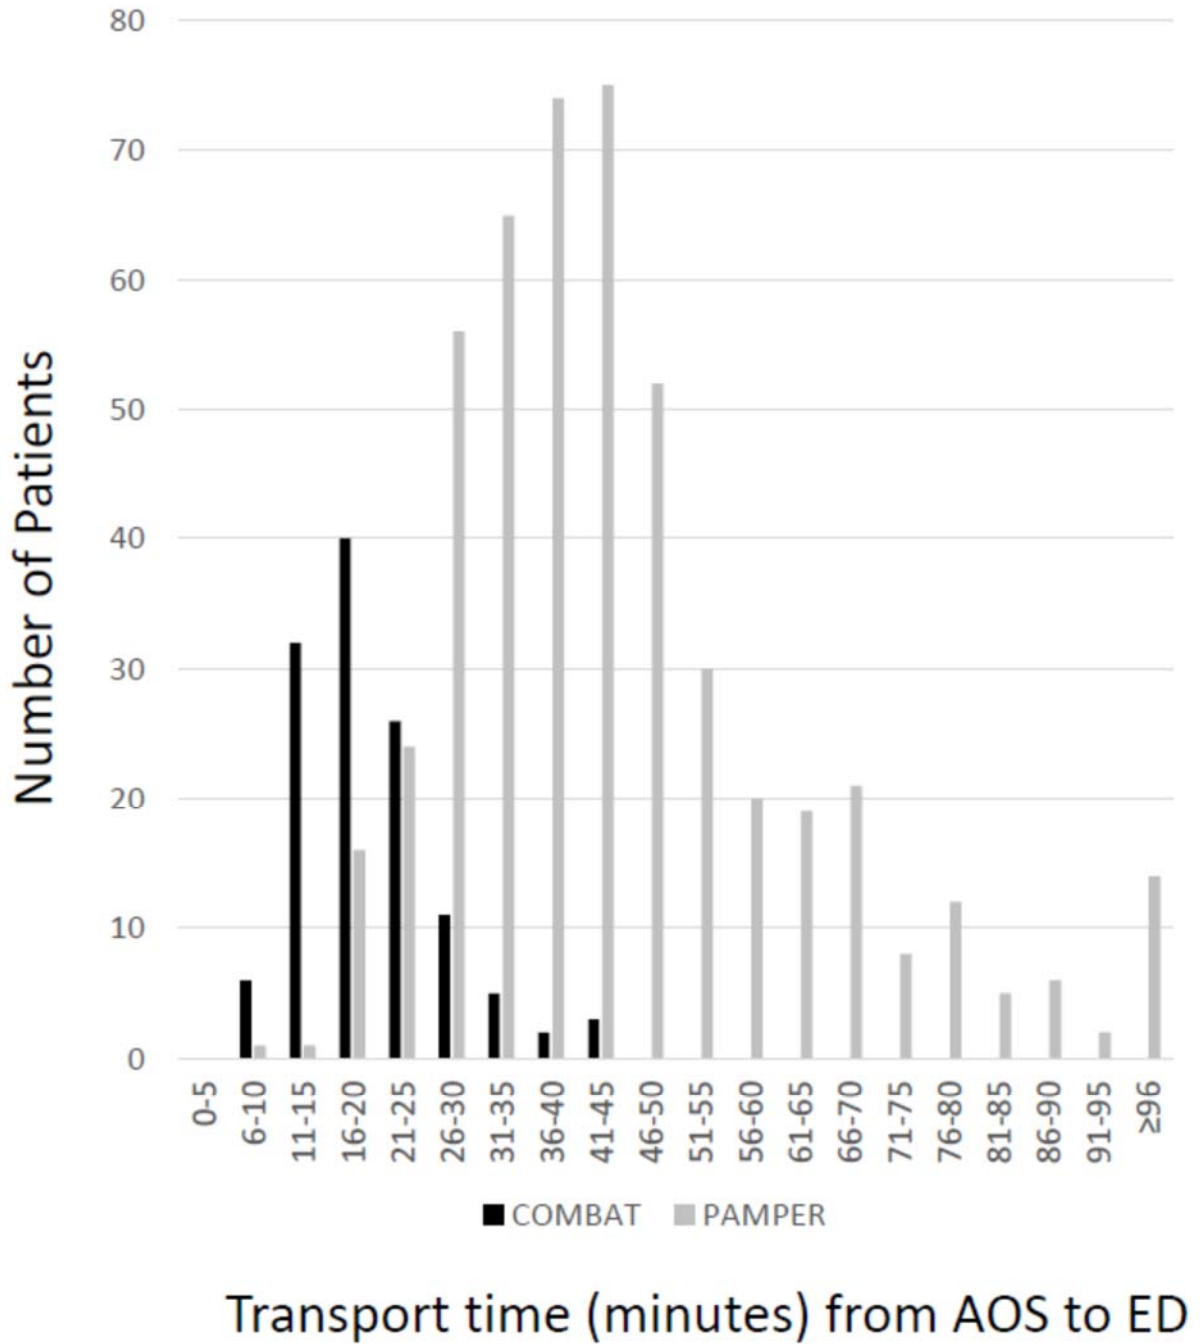



**eFigure 4.** International Normalized Ratio (INR) by Treatment (Plasma vs Standard Care [SC]) and Transport Time

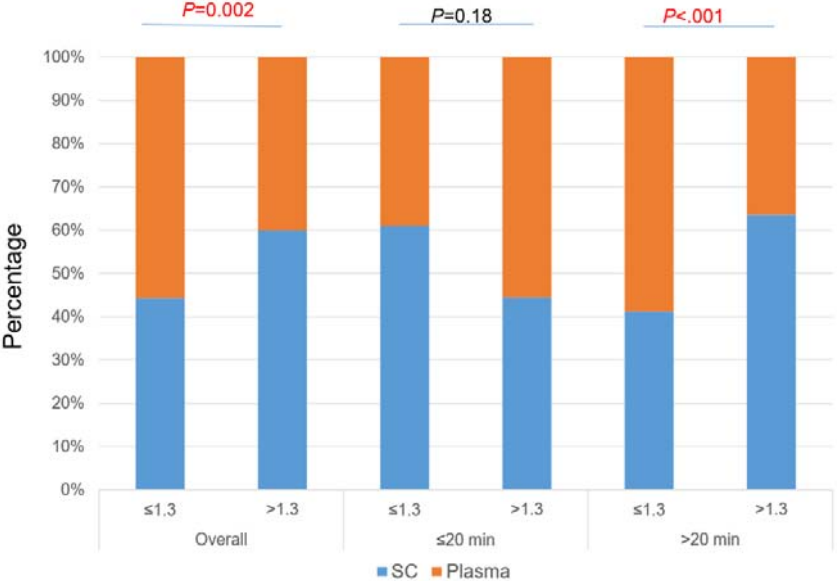

Likelihood of INR >1.3 is reduced in patients who received prehospital plasma compared with SC, OR (95% CI): 0.53 (0.35-0.80); P=.002
