# Supplementary material
Source: PubMed Central journal article supplement (PMC6990948)
Supplement: jamasurg-155-e195085-s003.pdf [file jamasurg-155-e195085-s003.pdf]

## Data Sharing Statement

Pusateri. Association of Prehospital Plasma Transfusion With Mortality in Trauma Patients With Hemorrhagic Shock When Transport Times Are Longer Than 20 Minutes. *JAMA Surg.* Published December 18, 2019. 10.1001/jamasurg.2019.5085

### Data

**Data available:** Yes

**Data types:** Deidentified participant data, Data dictionary

**How to access data:** This is not yet determined. The data will be made available in accordance with NIH guidelines and the requirements of the TACTIC Program (<https://www.tacticproject.org/>).

**When available:** beginning date: 10-01-2022

### Supporting Documents

**Document types:** None

### Additional Information

**Who can access the data:** The data will be made available in accordance with NIH guidelines and the requirements of the TACTIC Program (<https://www.tacticproject.org/>).

**Types of analyses:** The data will be made available in accordance with NIH guidelines and the requirements of the TACTIC Program (<https://www.tacticproject.org/>).

**Mechanisms of data availability:** This is not yet determined. The data will be made available in accordance with NIH guidelines and the requirements of the TACTIC Program (<https://www.tacticproject.org/>).
